# Supplementary material
Source: publisher site journal article supplement (https://www.dovepress.com/article/502161)
Supplement: Supplementary file 1 [file get_supplementary_file.php]

**Supplementary table 1** Ego-depletion task control inspection (M±SD)

| Variable | High ego-depletion group | Low ego-depletion group | *t* | *d* |
| --- | --- | --- | --- | --- |
| Effort level | 4.85±1.23 | 4.05±1.39 | 3.32** | 0.62 |
| Fatigue level | 3.54±1.38 | 2.75±1.39 | 3.07** | 0.56 |
| Energy loss | 3.59±1.24 | 2.89±1.14 | 3.15** | 0.59 |

**Note: ***p*<0.01**

**Supplementary table 2** Effectiveness test of emotional arousal operation (M±SD)

|  | Understanding | Funny degree | Positive emotions arousal | Negative emotions arousal |
| --- | --- | --- | --- | --- |
| Positive emotional videos | 3.89±0.74 | 3.49±1.04 | 3.69±0.87 | 1.63±0.70 |
| Neutral emotional videos | 3.76±1.04 | 1.53±0.82 | 2.73±1.13 | 1.73±0.91 |
| *F* | 0.59 | 88.58*** | 24.61*** | 0.42 |
| *η2* | - | 0.65 | 0.34 | - |

**Note: ****p*<0.001**

**Supplementary table 3** Coordinates, prefrontal cortex area and coverage corresponding to the experimental channel

| Channels | Coordinate  (x y z) | Corresponding Cerebral Cortex | Coverage Rate |
| --- | --- | --- | --- |
| CH01 | 24  43  51 | Frontal_Sup_R | 0.81 |
| CH02 | 11  50  50 | Frontal_Sup_Medial_R | 0.60 |
| CH03 | -9  52  48 | Frontal_Sup_Medial_L | 0.55 |
| CH04 | -23  42  50 | Frontal_Sup_L | 0.75 |
| CH05 | 36  44  42 | Frontal_Mid_R | 0.93 |
| CH06 | 18   55  42 | Frontal_Sup_R | 0.77 |
| CH07 | 03   57 40 | Frontal_Sup_Medial_L | 0.51 |
| CH08 | -15  56  40 | Frontal_Sup_L | 0.86 |
| CH09 | -35  43  41 | Frontal_Mid_L | 0.81 |
| CH10 | 29  58  32 | Frontal_Mid_R | 0.69 |
| CH11 | 14  64  32 | Frontal_Sup_R | 0.49 |
| CH12 | -10  63  34 | Frontal_Sup_Medial_L | 0.54 |
| CH13 | -27  57 31 | Frontal_Sup_L | 0.52 |
| CH14 | 40  57  21 | Frontal_Mid_R | 0.93 |
| CH15 | 21  68  24 | Frontal_Sup_R | 0.73 |
| CH16 | 03  67  24 | Frontal_Sup_Medial_L | 0.49 |
| CH17 | -21 67 22 | Frontal_Sup_L | 1.00 |
| CH18 | -40  55  23 | Frontal_Mid_L | 0.98 |
| CH19 | 31  67  12 | Frontal_Sup_R | 0.88 |
| CH20 | 13  72  16 | Frontal_Sup_Medial_R | 0.66 |
| CH21 | -15 72  14 | Frontal_Sup_L | 0.82 |
| CH22 | -33  64  12 | Frontal_Mid_L | 0.62 |

**Supplementary table 4** Validity test of emotional arousal operation (M±SD)

|  | PEV(N=24） | NEV(N=24） | t | d |
| --- | --- | --- | --- | --- |
| Pleasure | 3.42±0.83 | 2.29±0.81 | 4.76*** | 1.37 |
| Joy | 3.54±0.88 | 2.29±0.82 | 5.12*** | 1.47 |
| Sadness | 1.54±0.66 | 1.55±0.51 | 0 |  |
| Excitement | 2.67±0.96 | 2.29±0.81 | 1.46 |  |
| Anger | 1.54±0.72 | 1.37±0.49 | 0.93 |  |
| Fear | 1.50±0.72 | 1.50±0.59 | 0 |  |
| Delight | 2.71±0.75 | 2.17±0.82 | 2.39* | 0.69 |
| Anxiety | 1.63±0.65 | 1.91±0.72 | -1.48 |  |
| Sorrow | 1.58±0.65 | 1.58±0.66 | 0 |  |
| Happiness | 3.38±0.82 | 2.50±0.78 | 3.77*** | 1.09 |
| Positive emotions | 3.14±0.71 | 2.31±0.70 | 4.08*** | 1.17 |
| Negative emotions | 1.56±0.56 | 1.58±0.49 | -0.16 |  |

**Note: **p*<0.05, ****p*<0.001; PEV=Positive emotion video; NEV=Neutral emotion video**
